# Supplementary material
Source: PubMed Central journal article supplement (PMC5462064)
Supplement: supp_pp.17.00204_PP2017-UP-00204R2_Supplemental_Material.pdf [file supp_pp.17.00204_PP2017-UP-00204R2_Supplemental_Material.pdf]

**Supplementary Table 1:** Fossil Ginkgoales stomatal data used to estimate genome size (2c DNA amount)

| Fossil sample ID | Taxon              | Stratigraphic age <sup>1</sup> | Bed at Astartekløft (Height in section, m) <sup>1</sup> | Mean stomata Pore Length (spl in $\mu\text{m}$ ) (measured) <sup>2</sup> | Mean Guard Cell Length (gcl in $\mu\text{m}$ ) (estimated) <sup>3</sup> | Estimated 2C DNA amount (in Gbp) <sup>4</sup> |       |
|------------------|--------------------|--------------------------------|---------------------------------------------------------|--------------------------------------------------------------------------|-------------------------------------------------------------------------|-----------------------------------------------|-------|
| 46972            | <i>Baeira</i>      | <i>Rhaetian</i><br>(Triassic)  |                                                         | 1                                                                        | 24.32                                                                   | 36.48                                         | 7.39  |
| 46978            | <i>Baeira</i>      | <i>Rhaetian</i><br>(Triassic)  |                                                         | 1                                                                        | 19.54                                                                   | 29.31                                         | 2.46  |
| 46980            | <i>Baeira</i>      | <i>Rhaetian</i><br>(Triassic)  |                                                         | 1                                                                        | 16.09                                                                   | 24.14                                         | 0.92  |
| 46983            | <i>Baeira</i>      | <i>Rhaetian</i><br>(Triassic)  |                                                         | 1                                                                        | 19.95                                                                   | 29.93                                         | 2.73  |
| 46884            | <i>Ginkgo</i>      | <i>Rhaetian</i><br>(Triassic)  |                                                         | 1                                                                        | 14.89                                                                   | 22.34                                         | 0.63  |
| 46882            | <i>Ginkgo</i>      | <i>Rhaetian</i><br>(Triassic)  |                                                         | 1                                                                        | 18.45                                                                   | 27.68                                         | 1.84  |
| 46883            | <i>Ginkgo</i>      | <i>Rhaetian</i><br>(Triassic)  |                                                         | 1                                                                        | 18.03                                                                   | 27.05                                         | 1.64  |
| 46992            | <i>Ginkgo</i>      | <i>Rhaetian</i><br>(Triassic)  |                                                         | 2                                                                        | 18.80                                                                   | 28.20                                         | 2.02  |
| 47069            | <i>Ginkgo</i>      | <i>Rhaetian</i><br>(Triassic)  |                                                         | 2                                                                        | 19.14                                                                   | 28.71                                         | 2.22  |
| 47080            | <i>Ginkgo</i>      | <i>Rhaetian</i><br>(Triassic)  |                                                         | 2                                                                        | 21.50                                                                   | 32.25                                         | 3.98  |
| 47099            | <i>Ginkgo</i>      | <i>Rhaetian</i><br>(Triassic)  |                                                         | 2                                                                        | 19.12                                                                   | 28.68                                         | 2.20  |
| 47103            | <i>Ginkgo</i>      | <i>Rhaetian</i><br>(Triassic)  |                                                         | 2                                                                        | 19.10                                                                   | 28.65                                         | 2.19  |
| 46988            | <i>Ginkgo</i>      | <i>Rhaetian</i><br>(Triassic)  |                                                         | 2                                                                        | 26.66                                                                   | 39.99                                         | 11.74 |
| 47113            | <i>Ginkgo</i>      | <i>Rhaetian</i><br>(Triassic)  |                                                         | 2                                                                        | 17.45                                                                   | 26.18                                         | 1.39  |
| 47200            | <i>Baeira</i>      | <i>Rhaetian</i><br>(Triassic)  |                                                         | 3                                                                        | 15.29                                                                   | 22.94                                         | 0.72  |
| 47250            | <i>Baeira</i>      | <i>Rhaetian</i><br>(Triassic)  |                                                         | 3                                                                        | 17.78                                                                   | 26.67                                         | 1.53  |
| 47212            | <i>Shenobaeira</i> | <i>Rhaetian</i><br>(Triassic)  |                                                         | 3                                                                        | 17.48                                                                   | 26.22                                         | 1.40  |
| 47215            | <i>Shenobaeira</i> | <i>Rhaetian</i><br>(Triassic)  |                                                         | 3                                                                        | 17.77                                                                   | 26.66                                         | 1.52  |
| 47216            | <i>Shenobaeira</i> | <i>Rhaetian</i><br>(Triassic)  |                                                         | 3                                                                        | 16.59                                                                   | 24.89                                         | 1.08  |
| 47213            | <i>Shenobaeira</i> | <i>Rhaetian</i><br>(Triassic)  |                                                         | 3                                                                        | 16.45                                                                   | 24.68                                         | 1.03  |
| 48140            | <i>Shenobaeira</i> | <i>Rhaetian</i><br>(Triassic)  |                                                         | 3                                                                        | 17.00                                                                   | 25.50                                         | 1.22  |
|                  | <i>Ginkgoales</i>  | <i>Rhaetian</i>                |                                                         |                                                                          |                                                                         |                                               |       |
| Bulk- Ginkgo 1   | undet.             | (Triassic)                     |                                                         | 4                                                                        | 16.41                                                                   | 24.62                                         | 1.02  |
|                  | <i>Ginkgoales</i>  | <i>Rhaetian</i>                |                                                         |                                                                          |                                                                         |                                               |       |
| Bulk- Ginkgo 2   | undet.             | (Triassic)                     |                                                         | 4                                                                        | 20.02                                                                   | 30.03                                         | 2.78  |
|                  | <i>Ginkgoales</i>  | <i>Rhaetian</i>                |                                                         |                                                                          |                                                                         |                                               |       |
| Bulk- Ginkgo 3   | undet.             | (Triassic)                     |                                                         | 4                                                                        | 18.74                                                                   | 28.11                                         | 1.99  |

|                |                    |                   |   |       |       |       |
|----------------|--------------------|-------------------|---|-------|-------|-------|
|                | <i>Ginkgoales</i>  | <i>Rhaetian</i>   |   |       |       |       |
| Ast.5.2_SH_8   | undet.             | (Triassic)        | 5 | 19.23 | 28.85 | 2.27  |
| CB_5.2_Ginkgo  | <i>Ginkgoales</i>  | <i>Rhaetian</i>   |   |       |       |       |
| 1              | undet.             | (Triassic)        | 5 | 17.50 | 26.25 | 1.41  |
| 5.6/5.7_Ginkgo | <i>Ginkgoales</i>  | <i>Rhaetian</i>   |   |       |       |       |
| 1              | undet.             | (Triassic)        | 5 | 15.41 | 23.12 | 0.74  |
| 5.6/5.7_Ginkgo | <i>Ginkgoales</i>  | <i>Rhaetian</i>   |   |       |       |       |
| 2              | undet.             | (Triassic)        | 5 | 15.09 | 22.64 | 0.67  |
| 5.6/5.7_Ginkgo | <i>Ginkgoales</i>  | <i>Rhaetian</i>   |   |       |       |       |
| 3              | undet.             | (Triassic)        | 5 | 17.47 | 26.21 | 1.40  |
|                | <i>Ginkgoales</i>  | <i>Hettangian</i> |   |       |       |       |
| Ginkgo 1       | undet.             | (Jurassic)        | 6 | 12.07 | 18.11 | 0.22  |
|                | <i>Ginkgoales</i>  | <i>Hettangian</i> |   |       |       |       |
| Ginkgo 2       | undet.             | (Jurassic)        | 6 | 14.10 | 21.15 | 0.48  |
|                | <i>Ginkgoales</i>  | <i>Hettangian</i> |   |       |       |       |
| Ginkgo 3       | undet.             | (Jurassic)        | 6 | 12.80 | 19.20 | 0.29  |
|                | <i>Ginkgoales</i>  | <i>Hettangian</i> |   |       |       |       |
| Ginkgo 4       | undet.             | (Jurassic)        | 6 | 15.08 | 22.62 | 0.67  |
|                | <i>Ginkgoales</i>  | <i>Hettangian</i> |   |       |       |       |
| Ginkgo 5       | undet.             | (Jurassic)        | 6 | 14.29 | 21.44 | 0.51  |
|                |                    | <i>Hettangian</i> |   |       |       |       |
| 47671          | <i>Ginkgo</i>      | (Jurassic)        | 7 | 16.95 | 25.43 | 1.20  |
|                |                    | <i>Hettangian</i> |   |       |       |       |
| 47689          | <i>Ginkgo</i>      | (Jurassic)        | 7 | 27.63 | 41.45 | 14.05 |
|                |                    | <i>Hettangian</i> |   |       |       |       |
| 47720          | <i>Ginkgo</i>      | (Jurassic)        | 7 | 24.56 | 36.84 | 7.77  |
|                |                    | <i>Hettangian</i> |   |       |       |       |
| 47700          | <i>Ginkgo</i>      | (Jurassic)        | 7 | 23.99 | 35.99 | 6.90  |
|                |                    | <i>Hettangian</i> |   |       |       |       |
| 47760          | <i>Ginkgo</i>      | (Jurassic)        | 7 | 19.72 | 29.58 | 2.57  |
|                |                    | <i>Hettangian</i> |   |       |       |       |
| 47692          | <i>Shenobaeira</i> | (Jurassic)        | 7 | 16.03 | 24.05 | 0.91  |
|                |                    | <i>Hettangian</i> |   |       |       |       |
| 47735          | <i>Shenobaeira</i> | (Jurassic)        | 7 | 19.84 | 29.76 | 2.65  |
|                |                    | <i>Hettangian</i> |   |       |       |       |
| 47805          | <i>Shenobaeira</i> | (Jurassic)        | 8 | 26.48 | 39.72 | 11.35 |
|                |                    | <i>Hettangian</i> |   |       |       |       |
| 47820          | <i>Shenobaeira</i> | (Jurassic)        | 8 | 24.58 | 36.87 | 7.80  |
|                |                    | <i>Hettangian</i> |   |       |       |       |
| 47856          | <i>Shenobaeira</i> | (Jurassic)        | 8 | 24.92 | 37.38 | 8.36  |
|                |                    | <i>Hettangian</i> |   |       |       |       |
| 47869          | <i>Shenobaeira</i> | (Jurassic)        | 8 | 23.49 | 35.24 | 6.21  |
|                |                    | <i>Hettangian</i> |   |       |       |       |
| 47853          | <i>Shenobaeira</i> | (Jurassic)        | 8 | 35.14 | 52.71 | 47.13 |
|                |                    | <i>Hettangian</i> |   |       |       |       |
| 47863          | <i>Shenobaeira</i> | (Jurassic)        | 8 | 35.10 | 52.65 | 46.87 |
|                |                    | <i>Hettangian</i> |   |       |       |       |
| 47889          | <i>Shenobaeira</i> | (Jurassic)        | 8 | 25.03 | 37.55 | 8.55  |

<sup>1</sup> McElwain et al. (2007)

<sup>2</sup> Steinhorsdottir et al. (2011)

<sup>3</sup> gcl=1.5(spl)

<sup>4</sup> 2C DNA = (1.3894-Log<sup>10</sup>gcl)/-0.1987) Beaulieu et al. 2008
